# Supplementary material
Source: Royal Society of Chemistry journal article supplement (doi:10.1039/d6ay00279j)

**SUPPLEMENTARY MATERIAL:**

**Title:**

**A Green Analytical Method for Identification and Quantification of Carcinogenic Impurity N-Nitroso-Desformyl Riociguat in Riociguat Formulations by UHPLC-MS/MS**

**Authorship:**

Veeraswami Boddu<sup>1\*</sup> and Manoj Kumar Mandapaka<sup>2</sup>

**Affiliation:**

<sup>1,2</sup>Department of Chemistry, GITAM School of Science, GITAM Deemed to be University, Visakhapatnam, PIN-530045, India

**Email:**

\*Corresponding Author Mail ID: [veeraswamiboddu@gmail.com](mailto:veeraswamiboddu@gmail.com)

**ORCID:**

<https://orcid.org/0000-0002-4513-0250>

<https://orcid.org/0009-0004-0160-337X>

### **Supplemental Materials:**

From the research results of Analytical Method for Identification and Quantification of Genotoxic Impurity N-Nitroso-Desformyl Riociguat by Ultra-High-Performance Liquid Chromatography-Tandem Mass Spectrometry (UHPLC-MS/MS) in Riociguat Drug Product, herewith provided the reference Table(s) few reference Chromatograms, and a few supplementary material.

### **Discussion:**

#### **Quantitative Environmental Impact Comparison**

When compared to traditional nitrosamine analysis techniques, the developed UHPLC-MS/MS technology significantly reduced environmental effect. Below detailed comprehensive quantitative evaluations revealed practical sustainability gains in a number of areas. (Refer Table S6 for Reduction Comparison)

#### **a) Solvent Consumption Reduction:**

The method consumed approximately 15 mL total organic solvent per sample (10 mL MTBE for extraction, 5 mL methanol for reconstitution and mobile phase contribution), representing a 65% reduction compared to traditional GC-MS methods that typically require 40-50 mL per sample for extraction and derivatization procedures. Over 100 samples analyzed annually in a typical quality control laboratory, this translated to a reduction of 2.5-3.5 L of organic solvent waste, equivalent to approximately 6-8 kg CO<sub>2</sub> emission savings based on solvent lifecycle analysis.

#### **b) Sample Preparation Efficiency:**

The liquid-liquid extraction procedure required 35 minutes per sample (including vortexing, centrifugation, extraction, evaporation, and reconstitution), compared to 90-120 minutes for solid-phase extraction methods commonly employed for nitrosamine analysis. This 60-70% time reduction directly decreased energy consumption from laboratory equipment operation. Specifically, centrifugation (6 minutes at 200 W) and nitrogen evaporation (15 minutes at 150 W) consumed approximately 0.058 kWh per sample, compared to 0.180-0.220 kWh for SPE-based approaches requiring vacuum manifolds and extended drying steps.

**c) Analysis Time Optimization:**

The 15-minute chromatographic runtime enabled processing of 4 samples per hour, achieving superior throughput compared to 25-30 minute(s) methods reported for nitrosamine analysis in pharmaceuticals. When accounting for sample preparation time, the total analytical cycle (preparation + analysis) was completed in 50 minutes per sample, compared to 2.5-3.5 hours for conventional approaches. This efficiency improvement reduced instrument operation time by approximately 75%, translating to proportional decreases in energy consumption (UHPLC-MS/MS power draw: 1.2 kW) and extended instrument lifetime through reduced wear.

**d) Waste Minimization:**

The method generated approximately 25 mL total waste per sample (15 mL organic waste, 10 mL aqueous waste), classified as non-halogenated organic waste suitable for standard solvent recycling programs. Conventional approaches generated 60-80 mL mixed waste per sample, often including chlorinated solvents requiring specialized hazardous waste disposal. The 65-70% waste reduction resulted in estimated disposal cost savings of \$15-20 per sample and reduced environmental burden associated with waste incineration or specialized treatment.

**e) Carbon Footprint Assessment:**

A comprehensive lifecycle assessment considering solvent production, energy consumption, waste disposal, and consumable materials estimated the carbon footprint at approximately 0.85 kg CO<sub>2</sub>-equivalent per sample. This represented a 55-60% reduction compared to conventional methods (1.9-2.1 kg CO<sub>2</sub>-eq/sample), primarily attributable to reduced solvent consumption and shorter analysis time. When extrapolated to routine pharmaceutical quality control applications (estimated 500-1000 samples annually), the method contributed to annual carbon footprint reductions of 525-1,150 kg CO<sub>2</sub>-equivalent per laboratory.

**Table S1: Optimized Method conditions of the Chromatography hyphenated Mass Spectrometry (LC-MS/MS) with a Gradient Program**

| <b>Optimized Chromatographic Conditions:</b>    |                    |                                                            |                       |
|-------------------------------------------------|--------------------|------------------------------------------------------------|-----------------------|
| Injection Volume                                | :                  | 10 µL                                                      |                       |
| Flow Rate                                       | :                  | 0.5 mL/min. (Flow gradient)                                |                       |
| Sampler Temperature                             | :                  | 25°C                                                       |                       |
| Column Temperature                              | :                  | 35°C                                                       |                       |
| Run Time                                        | :                  | 15.0 min                                                   |                       |
| <b>Optimized Mass Spectrometric Conditions:</b> |                    |                                                            |                       |
| Ion source type                                 | :                  | Ion Focus Electrospray Ionization source (HESI)            |                       |
| Interface Heater                                | :                  | On                                                         |                       |
| Interface Temperature                           | :                  | 250°C                                                      |                       |
| Desolvation Temperature                         | :                  | 444°C                                                      |                       |
| DL Temperature                                  | :                  | 200°C                                                      |                       |
| Nebulizing Gas Flow                             | :                  | 3.00 L/min                                                 |                       |
| Heating Gas Flow                                | :                  | 3.00 L/min                                                 |                       |
| Heat Block                                      | :                  | 200°C                                                      |                       |
| Drying Gas Flow                                 | :                  | 3.00 L/min                                                 |                       |
| CID Gas                                         | :                  | 200 kpa                                                    |                       |
| Chromatographic peak width                      | :                  | 06 sec                                                     |                       |
| Start and End Time                              | :                  | 0.0 min and 15.0 min                                       |                       |
| <b>Gradient Program</b>                         |                    |                                                            |                       |
| Time (min)                                      | Flow rate (mL/min) | Mobile Phase A (%v/v)                                      | Mobile Phase B (%v/v) |
| 0.00                                            | 0.5                | 98                                                         | 2.0                   |
| 4.00                                            | 0.5                | 98                                                         | 2.0                   |
| 4.50                                            | 0.5                | 60                                                         | 40.0                  |
| 8.00                                            | 0.5                | 60                                                         | 40.0                  |
| 8.50                                            | 0.5                | 10                                                         | 90.0                  |
| 12.00                                           | 0.5                | 10                                                         | 90.0                  |
| 12.10                                           | 0.5                | 98                                                         | 2.0                   |
| 15.00                                           | 0.5                | 98                                                         | 2.0                   |
| Acquisition Mode                                | :                  | Multiple Reaction Monitoring (MRM) as per below conditions |                       |

| Compound           | Polarity | Precursor (m/z) | Product (m/z) | Dwell Time | Q1 Pre Bias | CE    | Q3 Pre Bias | Q1 Resolution | Q3 Resolution | Interface Volt. (kv) | Focus Volt. (kv) |
|--------------------|----------|-----------------|---------------|------------|-------------|-------|-------------|---------------|---------------|----------------------|------------------|
| NNDFR (Quantifier) | positive | 394.20          | 364.15        | 100.00     | -40.0       | -10.0 | -26.0       | unit          | unit          | 1.00kV               | 1.00kV           |
| NNDFR (Qualifier)  | positive | 394.20          | 255.15        | 100.00     | -40.0       | -24.0 | -28.0       | unit          | unit          | 1.00kV               | 1.00kV           |

**Table S2: Fragmentation profile of N-Nitroso-Desformyl Riociguat (NNDFR) under positive ESI conditions**

| Species                          | m/z (Obs./Theor.) | Proposed Structure / Key Functional Groups                 | Molecular Formula                                              | Mass (Da) | Fragmentation Mechanism                                                   | Notes / Diagnostic Value                               |
|----------------------------------|-------------------|------------------------------------------------------------|----------------------------------------------------------------|-----------|---------------------------------------------------------------------------|--------------------------------------------------------|
| <b>Parent [M+H]<sup>+</sup></b>  | 452.16 (Theor.)   | Protonated NNDFR intact molecule                           | C <sub>20</sub> H <sub>18</sub> FN <sub>9</sub> O <sub>3</sub> | 452.1589  | Ionization of intact molecule                                             | Full precursor, often unstable under source conditions |
| <b>Precursor Ion (in-source)</b> | 394.20 (Obs.)     | Loss of methyl carbamate group (-59 Da)                    | C <sub>18</sub> H <sub>16</sub> FN <sub>8</sub> O <sup>+</sup> | 394.1509  | In-source fragmentation prior to CID                                      | Used as primary precursor in MRM                       |
| <b>Fragment 1 (Quantifier)</b>   | 364.15 (Obs.)     | Loss of nitroso group (-30 Da) from precursor              | C <sub>18</sub> H <sub>16</sub> FN <sub>7</sub> <sup>+</sup>   | 364.1529  | NO group cleavage, diagnostic for nitrosamines                            | Monitored as quantifier transition                     |
| <b>Fragment 2 (Qualifier)</b>    | 255.15 (Obs.)     | Fluorobenzyl-pyrazolopyridine core with partial pyrimidine | C <sub>13</sub> H <sub>12</sub> FN <sub>4</sub> <sup>+</sup>   | 255.1046  | Stepwise loss of nitroso + amino moieties, retention of aromatic scaffold | Monitored as qualifier transition                      |
| <b>Fragment 3 (Theoretical)</b>  | 227.11            | Fluorobenzyl-pyrazolopyridine core                         | C <sub>11</sub> H <sub>10</sub> FN <sub>4</sub> <sup>+</sup>   | 227.0890  | CN group loss from Fragment 2                                             | Supportive, theoretical                                |
| <b>Fragment 4 (Theoretical)</b>  | 199.06            | Fluorobenzyl-pyrazolopyridine base                         | C <sub>9</sub> H <sub>7</sub> FN <sub>4</sub> <sup>+</sup>     | 199.0733  | Pyrimidine ring loss from Fragment 3                                      | Supportive, theoretical                                |
| <b>Fragment 5 (Theoretical)</b>  | 171.04            | Fluorobenzyl-pyrazole fragment                             | C <sub>7</sub> H <sub>5</sub> FN <sub>4</sub> <sup>+</sup>     | 171.0577  | Pyridine ring loss from Fragment 4                                        | Supportive, theoretical                                |

| Species                  | m/z (Obs./Theor.) | Proposed Structure / Key Functional Groups | Molecular Formula                            | Mass (Da) | Fragmentation Mechanism                   | Notes / Diagnostic Value         |
|--------------------------|-------------------|--------------------------------------------|----------------------------------------------|-----------|-------------------------------------------|----------------------------------|
| Fragment 6 (Theoretical) | 109.02            | Fluorobenzyl cation                        | C <sub>7</sub> H <sub>6</sub> F <sup>+</sup> | 109.0392  | Pyrazole ring loss, fluorobenzyl retained | Characteristic terminal fragment |

**Table S3: Regression results obtained from LOQ level to 200% level solutions**

| Linearity Levels                          | N-Nitroso-Desformyl Riociguat Impurity |            |
|-------------------------------------------|----------------------------------------|------------|
|                                           | Conc. in (µg/mL)                       | Avg. Area  |
| LOQ Level                                 | 0.00123                                | 660457.5   |
| 50% Level                                 | 0.00615                                | 2916898    |
| 100% Level                                | 0.01230                                | 6490238    |
| 125% Level                                | 0.01537                                | 7384412    |
| 150% Level                                | 0.01845                                | 9019023    |
| 200% Level                                | 0.02459                                | 11947314.5 |
| Slope                                     | 484356327.862                          |            |
| %Y-Intercept                              | 99660.0                                |            |
| Correlation Coefficient (R <sup>2</sup> ) | 1.00                                   |            |

**Table S4: Evaluation & Inference on Ruggedness and Filter Compatibility**

| Parameter                            | Result | Acceptance Criteria                                |
|--------------------------------------|--------|----------------------------------------------------|
| Blank Interference                   | ND     | No interference or < sensitivity solution response |
| Sensitivity Solution S/N Ratio       | 152    | ≥ 10                                               |
| System Suitability (%RSD)            | 0.7    | ≤ 15.0                                             |
| Cumulative System Suitability (%RSD) | 1.2    | ≤ 20.0 cumulative                                  |
| %RSD for Spiked Content              | 0.4    | ≤ 15.0                                             |
| Cumulative %RSD for Spiked Content   | 0.8    | ≤ 20.0                                             |
| Filter Compatibility (%Difference)   | 1.9    | ≤ ±25.0                                            |

**Table S5: Evaluation & Inference on Robustness (Low & High Flow Rate and Low & High Column Temp.)**

| Parameter                                                                               | Result        | Acceptance Criteria                                |
|-----------------------------------------------------------------------------------------|---------------|----------------------------------------------------|
| Blank Interference (Low & High Flow Rate and Low & High Column Temp.)                   | Not Detected  | No interference or < sensitivity solution response |
| Sensitivity Solution S/N Ratio (Low & High Flow Rate and Low & High Column Temp.)       | 41–955        | $\geq 10$                                          |
| System Suitability (Low & High Flow Rate and Low & High Column Temp.) (%RSD)            | 1.9–5.4       | $\leq 15.0$                                        |
| Cumulative System Suitability (Low & High Flow Rate and Low & High Column Temp.) (%RSD) | 1.8–6.5       | $\leq 20.0$ cumulative                             |
| %RSD for Spiked Content (Low & High Flow Rate and Low & High Column Temp.)              | 0.8–6.2       | $\leq 15.0$                                        |
| %Difference (Low & High Flow Rate and Low & High Column Temp.)                          | -12.5 to -6.2 | $\leq \pm 25.0$                                    |

**Table S6: Quantitative Environmental Impact Comparison**

| Parameter                                    | This Method                 | Conventional Methods           | Improvement      |
|----------------------------------------------|-----------------------------|--------------------------------|------------------|
| Organic solvent per sample                   | 15 mL                       | 40-50 mL                       | 65% reduction    |
| Sample prep time                             | 35 min                      | 90-120 min                     | 60-70% reduction |
| Total analysis time                          | 50 min                      | 150-210 min                    | 67-76% reduction |
| Energy consumption per sample                | 0.060 kWh                   | 0.180-0.220 kWh                | 67-73% reduction |
| Waste generated per sample                   | 25 mL                       | 60-80 mL                       | 58-69% reduction |
| Carbon footprint per sample                  | 0.85 kg CO <sub>2</sub> -eq | 1.9-2.1 kg CO <sub>2</sub> -eq | 55-60% reduction |
| Samples per 8-hour shift                     | 9.6                         | 2.7                            | 256% increase    |
| Annual CO <sub>2</sub> savings (500 samples) | --                          | --                             | 525-625 kg       |

**Figures:**

**Fig. S1: Blank solution Chromatogram using MRM mode under conditions described in Sections 2.7 and 2.8, confirming absence of interference at the NNDFR retention time.**

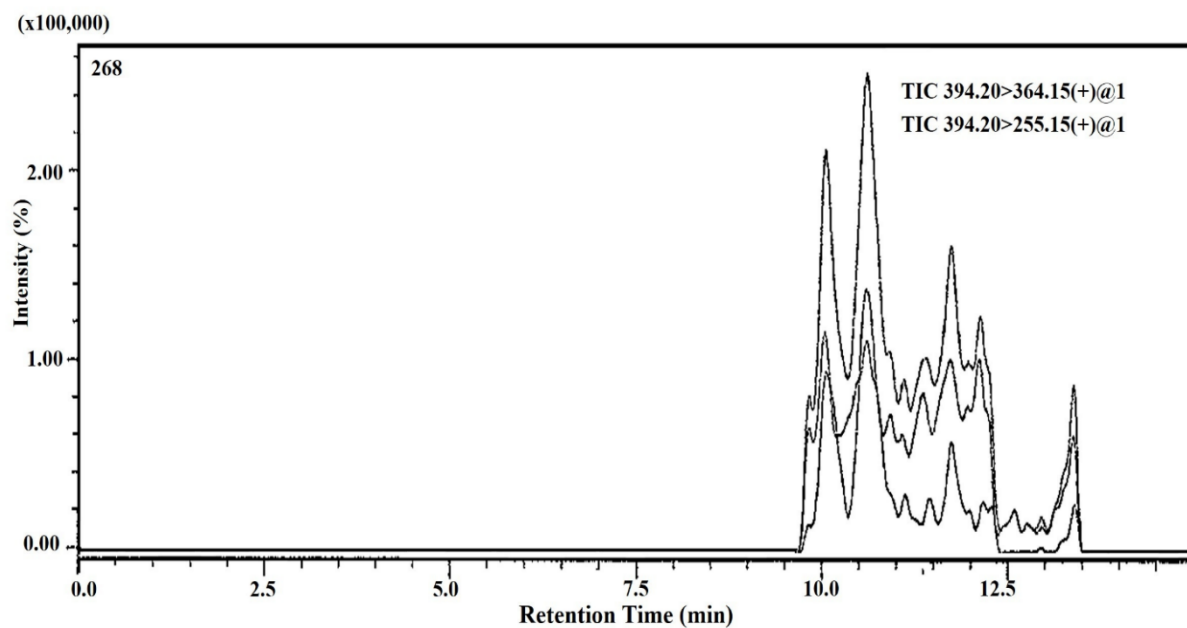

**Fig. S2: Quantified Chromatogram of Placebo Solution extract prepared according to Section 2.3, showing no interfering peaks at the NNDFR retention time, supporting method specificity**

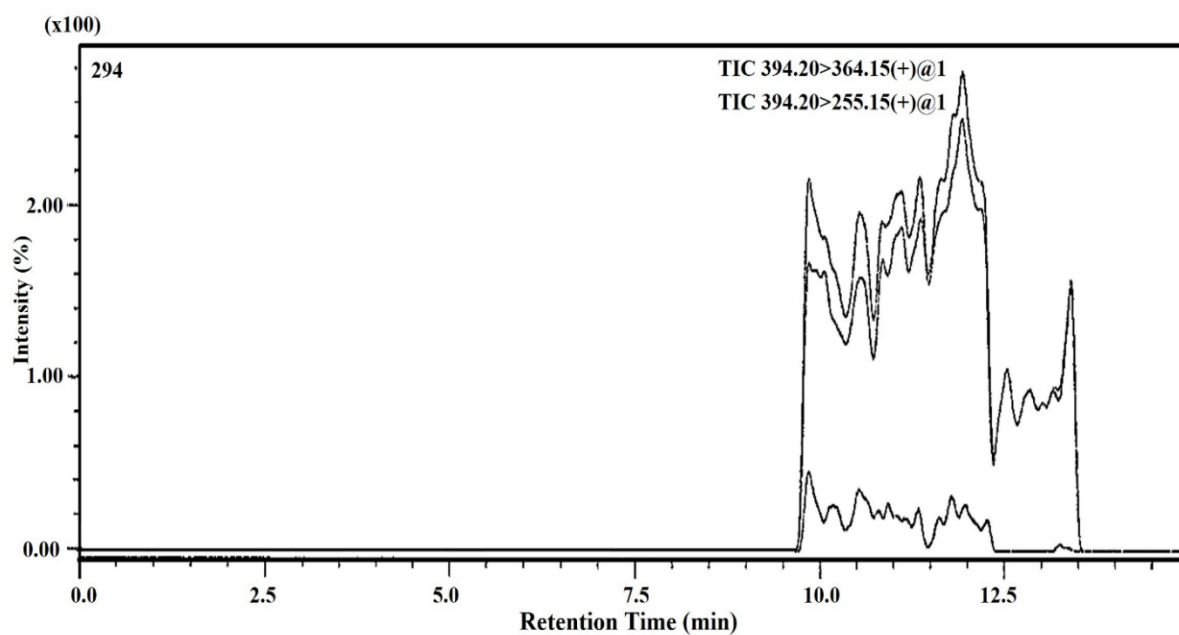

**Fig. S3: Representative UHPLC–MS/MS Quantified Chromatogram of NNDFR at the LOD Level (~0.40 ppm)**

**Note:** The displayed trace was obtained by averaging replicate injections (n = 3) to enhance visualization of signal quality and baseline stability. Quantitative determination of LOD was performed on raw unprocessed chromatograms, with an observed signal-to-noise ratio of approximately 3, consistent with ICH criteria.

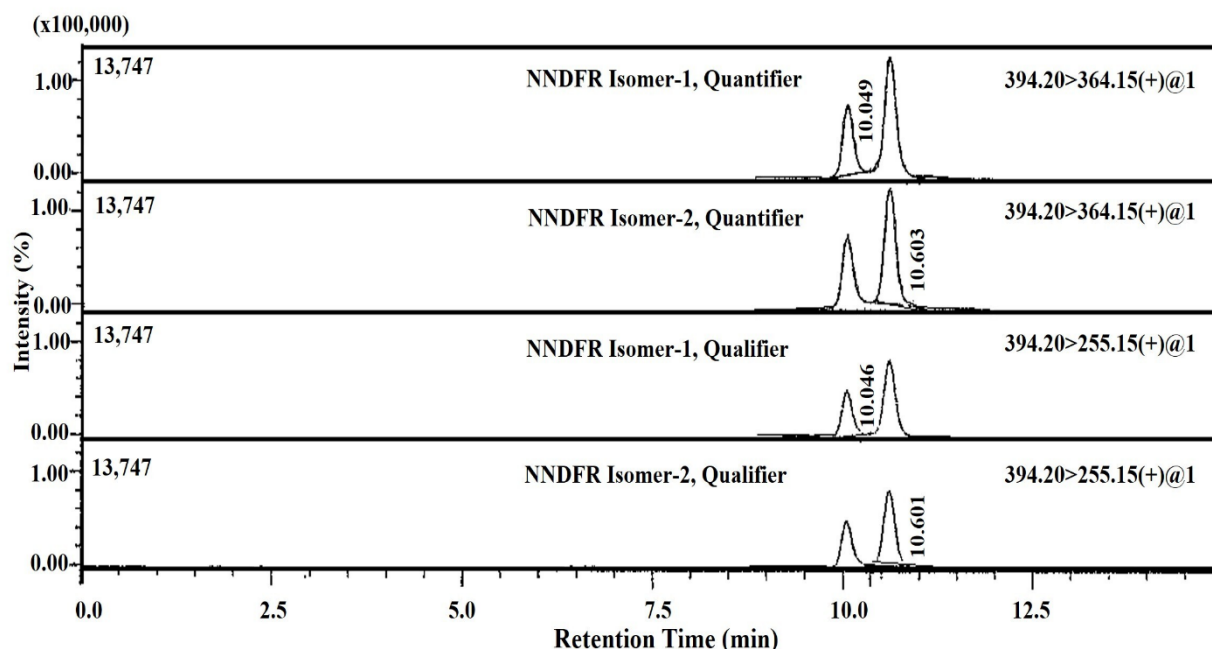

**Fig. S4: Representative UHPLC–MS/MS Quantified Chromatogram of NNDFR at the LOQ Level (~1.22 ppm)**

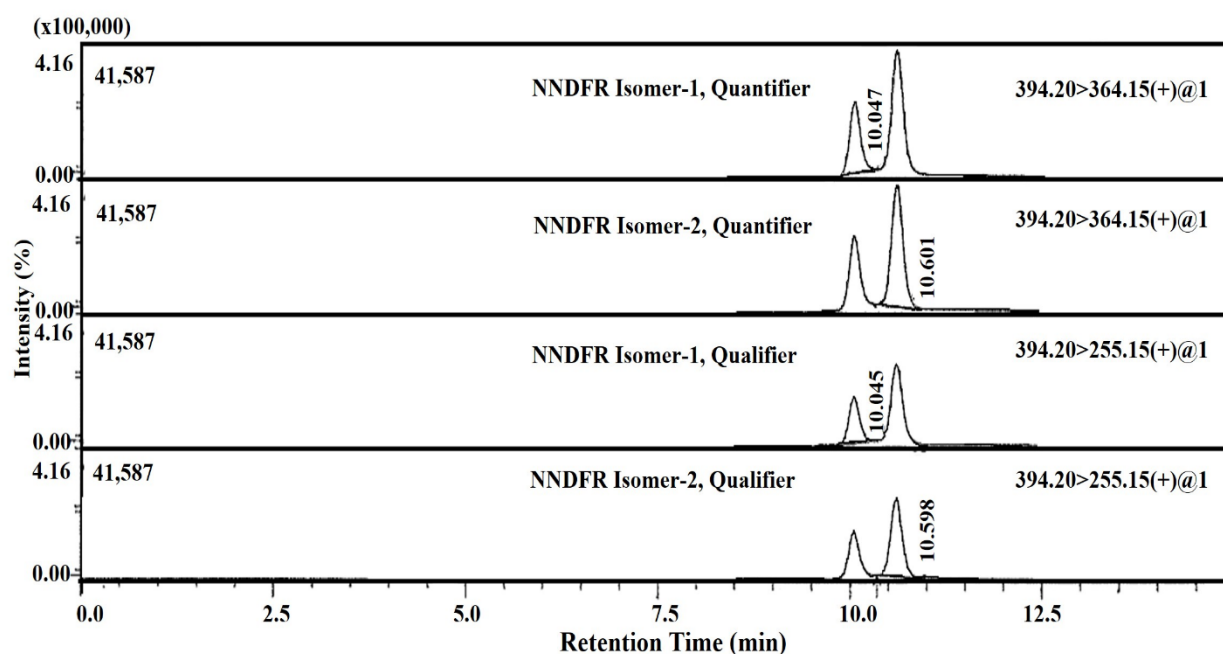

Supplement: d6ay00279j1.pdf [file d6ay00279j1.pdf]
